# Supplementary material for: Prognostic value of PLA2R autoimmunity detected by measurement of anti-PLA2R antibodies combined with detection of PLA2R antigen in membranous nephropathy: A single-centre study over 14 years
Source: PubMed Central journal article supplement (PMC5336294; doi:10.1371/journal.pone.0173201), 2017-03-03
Supplement: pone.0173201.s002.pdf [file pone.0173201.s002.pdf]

**Comité de  
Protection des  
Personnes  
Ile de France IV**

**Agrément du Ministère de la Santé  
et des Solidarités**  
arrêté du 12 juin 2006 (J.O. 27 juin  
2006)

**Hôpital Saint-Louis**  
Porte 5 du carré Historique  
1 avenue Claude Vellefaux  
75475 Paris Cedex 10

**Responsable  
administrative :**  
Mme I. SCAGLIA  
Tél. : 01.42.38.92.88  
Fax : 01.42.38.92.98  
[cpp.iledefrance4@orange.fr](mailto:cpp.iledefrance4@orange.fr)

**Président :**  
Dr J.-P. CESARINI  
**Vice-président :**  
M. Marc BORAND  
**Secrétaire générale :**  
Mme M. ASTRIE-BELICK  
**Secrétaires générales adjointes :**  
Mme B. LEHMANN  
Dr S. KLOUCHE  
**Trésorier :**  
Pr O. CHASSANY  
**Trésorière Adjointe :**  
Mme C. MASCRET

**Membres du Comité :**  
**Collège I**  
**Médecins et chercheurs**  
O. CHASSANY  
P. CHAUMET-RIFFAUD  
J.-P. CESARINI  
E. CAROSELLA  
S. KLOUCHE  
M.-H. DIZIER  
B. PAPP  
F. ADNET  
P. GOLDSCHMIDT  
**Pharmacien hospitalier**  
B. LEHMANN  
**Infirmière**  
C. DELETOILLE-LANDRE  
M. ASTRIE-BELICK

**Collège II**  
**Questions éthiques**  
J.-C. KRZYWKOWSKI  
**Psychologue**  
L. LACOSTE  
**Travailleur social**  
M. BORAND  
**Compétence juridique**  
C. MASCRET  
P. A. DUMAS  
P. AUBRY  
M. BOUCHER  
**Associations de maladies  
et d'usagers**  
M. BERNARD-HARLAUT  
M. TROUGOUBOFF  
A.M MASURE

**Institutional Review Board**  
Agrément de : US Department of  
Health and Human Services  
(n° IRB 00003835)

**Institutional Review Board**  
**Agrément de : US Department of Health  
and Human Services (n° IRB 00003835)**

Paris, le 14 mars 2013

**Hôpital TENON**  
**Pr P. RONCO**  
**Service de néphrologie**  
**4 rue de la Chine**  
**759 70 Paris Cedex 20**

Madame, Monsieur,

Le Comité a bien reçu votre courrier du 31 janvier 2013 concernant l'étude intitulée :

**Protocole 2013/08NICB**

**« Etude sérologique et génétique chez les patients suivis pour une  
glomérulonéphrite extra membraneuse. »**

Gestionnaire : SERVICE DE NEPHROLOGIE ET DIALYSES de l'HOPITAL TENON  
Clinicien coordonnateur : Pr RONCO (Hôpital Tenon, Service de néphrologie et dialyses)

L'objectif principal est d'étudier la prévalence et l'évolution des anticorps anti-PLA2R chez les patients de la cohorte.

Le Comité a examiné les informations relatives à ce projet lors de la séance du 28 février 2013 et a émis une demande motivée d'informations complémentaires.

**Membres présents :** Dr J.-P. Cesarini (I), Pr O. Chassany (I), Dr E. Carosella (I), Mme C. Deletoille (I), Dr S. Klouche (I), Mme B. Lehmann (I), Mr B. Papp (I), Mme M. Bernard-Harlaut (II), Mr M. Borand (II), M. J.-C. Krzywkowski (II), Mme L. Lacoste (II), Mme C. Mascret (II), Mme A. M. Masure (II), Mme M. Astrie-Bellick (I), Mme M.H Dizier (I).

**Suite à l'examen des documents soumis, le Comité confirme qu'il s'agit  
d'une étude non interventionnelle, n'entrant pas dans le champ d'application  
de la loi n°2004-806 du 9 août 2004 relative à la politique de santé  
publique.**

**Le CPP approuve les documents d'information.**

**Dr Jean-Pierre CESARINI**  
**Président**

- Votre courrier du 31/01/2013
- Protocole version 1 du 10/12/2012
- Résumé version 1 du 10/12/2012
- Liste des investigateurs version 1 du 10/12/2012
- Lettre d'information et consentement pour conservation des prélèvements avant biopsie rénale version pas datée
- Lettre d'information et consentement pour conservation des prélèvements réalisés dans le cadre du suivi de votre glomérulopathie extra membraneuse version pas datée
- Votre courriel de réponse du 14/03/2013
